# Supplementary material for: MoS2nanosheets as an effective fluorescence quencher for DNA methyltransferase activity detection
Source: Royal Society of Chemistry journal article supplement (doi:10.1039/c4an02133a), 2015-01-01
Supplement: c4an02133a1.pdf [file c4an02133a1.pdf]

## ***Supporting Information***

### **MoS<sub>2</sub> nanosheets as an effective fluorescence quencher for DNA methyltransferase activity detection**

Huimin Deng, Xinjian Yang, and Zhiqiang Gao\*

Department of Chemistry, National University of Singapore, Singapore 117543.

\*Corresponding author. Tel: +65-6516-3887, Fax: +65-6779-1691, email: chmgaoz@nus.edu.sg

#### **AFM characterization of MoS<sub>2</sub> nanosheets**

The obtained MoS<sub>2</sub> nanosheets were characterized by on Veeco Digital instruments Dimension 3000 SPM. The morphology and height profile were shown in Figure S1.

#### **Fluorescence lifetime decay**

The fluorescence lifetime decay of FAM-labeled substrate DNA in the absence and in the presence of MoS<sub>2</sub> nanosheets was measured by using a time-correlated singlephoton counting (TCSPC) technique. The frequency-doubled output (420 nm) of an Avesta TiF-100M femtosecond Ti:sapphire oscillator was used as the excitation source. Fluorescence at 520 nm was collected by an optical fiber that is directed to an avalanche photodiode (APD). The signals were processed by a TCSPC module (PicoQuant, PicoHarp 300) with temporal resolution of ~150 ps. The FAM-labeled ds-DNA substrate in the final mixture was 100 nM, the concentration of MoS<sub>2</sub> was 0.5 µg/mL. The result was shown in Figure S2.

#### **Optimization of MoS<sub>2</sub> concentration.**

To achieve efficient quenching using minimal MoS<sub>2</sub> nanosheets, the final concentration of MoS<sub>2</sub> nanosheets in the sensing system was optimized. The quenching efficiency (QE) was calculated using the following equation:

$$QE = \frac{F_0 - F}{F_0} \times 100 \%$$

where  $F$  is the fluorescence intensity of substrate DNA in reaction buffer treated with ethanol/water (45%, v/v) dispersed  $\text{MoS}_2$  nanosheets, and  $F_0$  is the fluorescence intensity of substrate DNA in reaction buffer mixed with ethanol/water. The concentration of DNA in the final mixture used for fluorescence recording was 50 nM. The corresponding plot of quenching efficiency versus the  $\text{MoS}_2$  concentration was shown in Figure S3.

### Quenching performance comparison between $\text{MoS}_2$ and graphene oxide.

The fluorescence quenching efficiency of  $\text{MoS}_2$  nanosheets was compared to that of graphene oxide (GO). The concentration of DNA in the final mixture was 50 nM. The corresponding fluorescence spectra were depicted in Figure S4.

### Optimization of quenching time.

The variation of fluorescence intensity upon the addition of the quencher  $\text{MoS}_2$  nanosheets was depicted in Figure S5. The  $\text{MoS}_2$  concentration was the optimal. As can be seen, the quenching process of the fluorescence of fluorophore by  $\text{MoS}_2$  nanosheets is very fast.

### Centrifugation effect on background signal.

Before fluorescence recording, short time centrifugation could effectively reduce the background signal. Figure S6 shows the fluorescence emission spectra of the quenched DNA substrate without and with centrifugation.

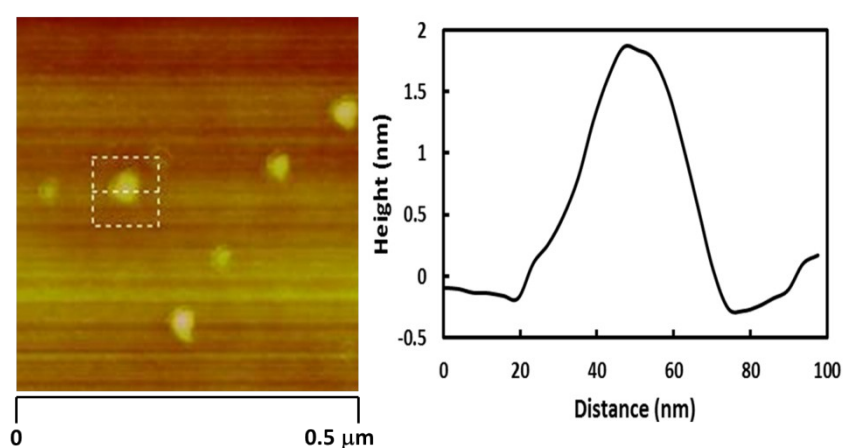

**Figure S1.** AFM characterization of  $\text{MoS}_2$  nanosheets.

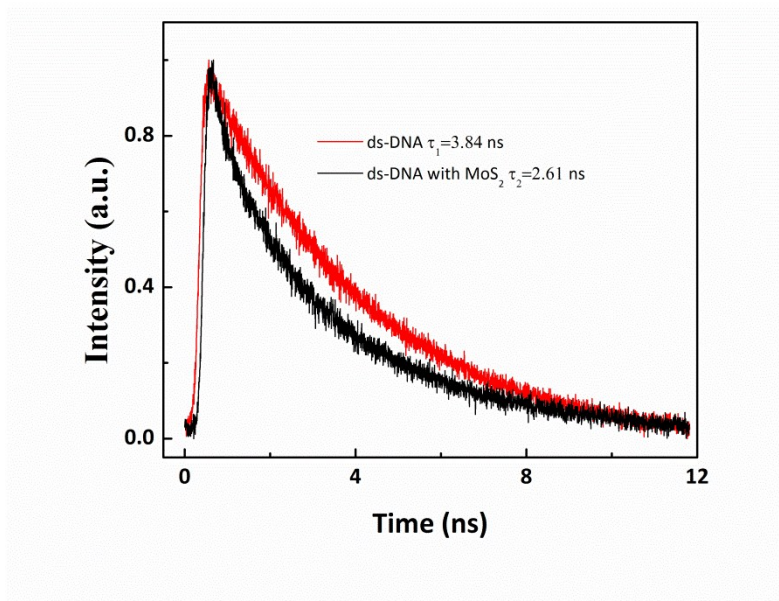

**Figure S2.** Fluorescence lifetime decay of FAM-labeled DNA in the absence and in the presence of MoS<sub>2</sub> nanosheets.

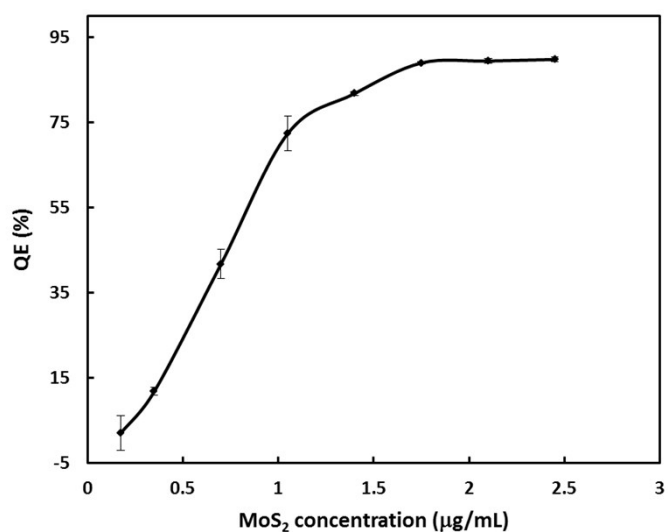

**Figure S3.** Quenching efficiency of FAM-labeled substrate DNA with the addition of different concentrations of MoS<sub>2</sub> nanosheets.

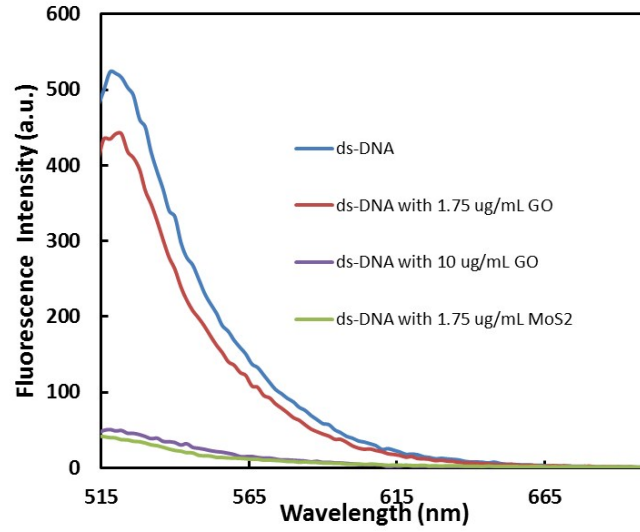

**Figure S4.** Fluorescence quenching of MoS<sub>2</sub> nanosheets and GO.

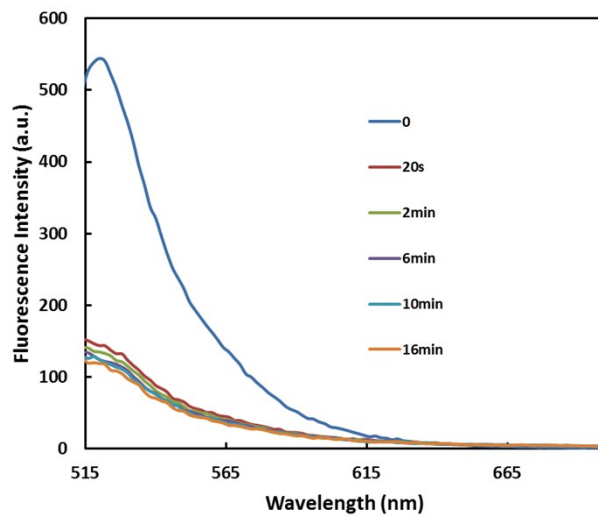

**Figure S5.** Fluorescence intensity variation upon the addition of MoS<sub>2</sub> nanosheets.

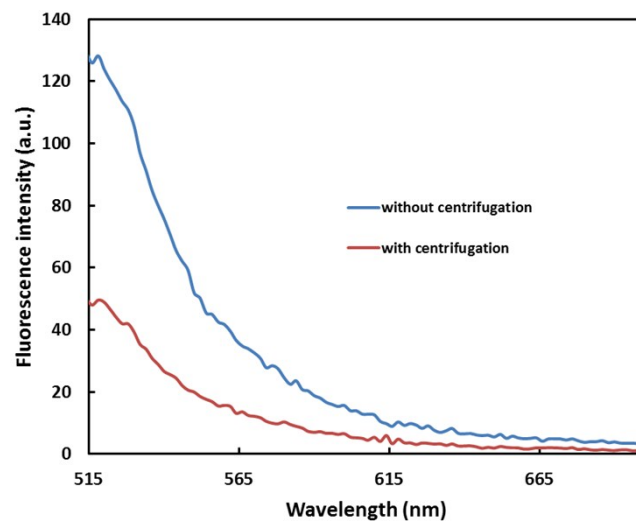

**Figure S6.** Centrifugation effect on the background signal.
